# Supplementary material for: Genetic Diversity of Hepatitis B and C Viruses Revealed by Continuous Surveillance from 2015 to 2021 in Gabon, Central Africa
Source: MDPI journal article supplement (doi:10.3390/microorganisms11082046), 2023-08-09
Supplement: s1 [file s1]

## Supplementary Materials

**Table S1.** Primer sequences used in this study.

| Name                        | Sequence                      |
|-----------------------------|-------------------------------|
| HBV qPCR                    |                               |
| HBV-qPCR_Fw                 | CCGTCTGTGCCTTCTCATCTG         |
| HBV-qPCR_Rv                 | AGTCCAAGAGTYCTCTTATGYAAGACCTT |
| HBV-qPCR_Probe              | CCGTGTGCACTTCGCTTCACCTCTGC    |
| HCV qPCR                    |                               |
| HCV-qPCR_Fw                 | TGCTAGCCGAGTAGYGTTGG          |
| HCV-qPCR_Rv                 | ACTCGCAAGCACCTATCAG           |
| HCV-qPCR_Probe              | ACCACAAGGCCTTTCGCRAC          |
| HBV genotyping              |                               |
| HBV_GT_Fw1                  | GGGTCACCATATTCTTGGG           |
| HBV_GT_Rv1                  | CCAAAGACAAAAGAAAATTGGTAAC     |
| HBV_GT_Fw2                  | GAACAAGAGCTACAKCATGGG         |
| HBV_GT_Rv2                  | CGGTAWAAAGGGACTCAAGATG        |
| HCV genotyping              |                               |
| HCV_GT_Fw                   | TATGAYACCCGCTGYTTTGACTC       |
| HCV_GT_Rv                   | GTAYCTCGTCATAGCYTCCGTGAA      |
| HBV whole-genome sequencing |                               |
| HBV_WG1_Fw1                 | GTGCACTTCGCTTCACCTCT          |
| HBV_WG1_Rv                  | CCACCTTRTGAGTCCAAGGA          |
| HBV_WG1_Fw2                 | CTTGAGGCYTACTTCAAAGACTGTG     |
| HBV_WG2_Fw1                 | GCTCACCTCACCATACAGCA          |
| HBV_WG2_Rv                  | GAATGCAGGGTCCAAGTAT           |
| HBV_WG2_Fw2                 | GCTCWCCTCACCATACAGCA          |
| HBV_WG3_Fw1                 | TCCTGTCCTCCAATTTGTCC          |
| HBV_WG3_Rv                  | GCCTGAGTGCTGTATGGTGA          |
| HBV_WG3_Fw2                 | TCAGTGGTTCGTAGGGCTTT          |

**Table S2.** HBV strains showing high nucleotide identity to HBV-A3, HBV-A1, and HBV-E strains detected in this study.

| HBV-A3: SYMAV-D0231 |                      |         |            |              |               |
|---------------------|----------------------|---------|------------|--------------|---------------|
| #                   | Description          | E value | Identity % | Country      | Accession no. |
| 1                   | HBV isolate O64      | 0       | 98.98%     | Gabon        | AM184125      |
| 2                   | HBV isolate N35      | 0       | 98.82%     | Gabon        | AM184126      |
| 3                   | HBV strain FE-929-MO | 0       | 97.98%     | Gabon        | EU054331      |
| HBV-A1: SYMAV-H0721 |                      |         |            |              |               |
| 1                   | HBV isolate A1-SA    | 0       | 98.83%     | South Africa | KP234050      |
| 2                   | HBV isolate 833      | 0       | 98.55%     | South Africa | AY233289      |
| 3                   | HBV isolate rw14-48  | 0       | 98.51%     | Rwanda       | MK512473      |
| HBV-E: SYMAV-H0235  |                      |         |            |              |               |
| 1                   | HBV isolate Eafr     | 0       | 95.16%     | Guinea       | KX186584      |
| 2                   | HBV isolate GU1214   | 0       | 94.91%     | Guinea       | GQ161816      |
| 3                   | HBV isolate CAR039   | 0       | 94.91%     | CAR          | AM494693      |
